# Supplementary material for: Identification and Validation of an m7G-Related lncRNAs Signature for Prognostic Prediction and Immune Function Analysis in Endometrial Cancer
Source: MDPI journal article supplement (doi:10.3390/genes13081301), 2022-07-22
Supplement: s1 [file s1]

## **SUPPLEMENTARY TABLE**

### **Identification and Validation of an m7G-Related lncRNAs Signature for Prognostic Prediction and Immune Function Analysis in Endometrial Cancer**

Jiani Sun †, Li Li †, Hong Chen, Lei Gan, Xiaoqing Guo and Jing Sun \*

Department of Gynecology, Shanghai First Maternity and Infant Hospital, School of Medicine, Tongji University, Shanghai 200092, China; sunjiani5947@163.com (J.S.); 1931199@tongji.edu.cn (L.L.); chenhong377@163.com (H.C.); gan\_leilei@126.com (L.G.); xiaoqing\_guo@tongji.edu.cn (X.G.)

\* Correspondence: sunjing61867@tongji.edu.cn

† These authors contributed equally to this work.

**Table S1** The differentially expressed genes (DEGs) between low-risk and high-risk groups

| Gene Symbol | LowMean    | HighMean   | logFC      | P.Value    | FDR        |
|-------------|------------|------------|------------|------------|------------|
| NKX2-1      | 0.701069   | 2.69425709 | 1.94225917 | 0.01700992 | 0.03796066 |
| DMBT1       | 6.58762328 | 2.43656781 | -1.4349077 | 1.47E-06   | 1.81E-05   |
| AC005912.1  | 12.2055487 | 28.5586696 | 1.22639162 | 1.49E-10   | 1.16E-08   |
| AC090498.1  | 10.9575867 | 26.4391318 | 1.27074471 | 5.79E-08   | 1.35E-06   |
| PTX3        | 0.80353958 | 1.86677278 | 1.21610534 | 4.99E-05   | 0.00032014 |
| OMG         | 5.11519343 | 2.14466203 | -1.2540385 | 2.82E-10   | 2.06E-08   |
| KLK5        | 2.59822474 | 6.83328758 | 1.39505362 | 0.00888821 | 0.02238887 |
| RNA5SP370   | 2.59507338 | 0.92541823 | -1.4875979 | 0.0056055  | 0.01541161 |
| HIF3A       | 0.86917294 | 1.98168383 | 1.18901165 | 5.99E-08   | 1.38E-06   |
| FBXO17      | 1.5291965  | 3.43364664 | 1.16696777 | 3.32E-05   | 0.00022593 |
| C1QL1       | 2.56263695 | 6.76622522 | 1.4007221  | 7.68E-05   | 0.00045799 |
| MS4A8       | 19.6219184 | 8.5170115  | -1.2040469 | 2.51E-06   | 2.77E-05   |
| RSPO3       | 1.51822378 | 3.91706602 | 1.36738899 | 0.01008544 | 0.02478292 |
| COL9A3      | 2.4282941  | 5.23658567 | 1.1086833  | 1.14E-06   | 1.45E-05   |
| AC018475.1  | 0.76115269 | 1.52697193 | 1.00441575 | 8.55E-06   | 7.39E-05   |
| GAL3ST3     | 0.90868474 | 2.05591518 | 1.17792898 | 0.00029644 | 0.00138591 |
| UPK1B       | 37.7700554 | 18.0682091 | -1.0637894 | 8.89E-08   | 1.90E-06   |
| CXCL5       | 10.3932678 | 5.19625779 | -1.0001044 | 0.00039719 | 0.001756   |
| GRIK5       | 1.33246866 | 2.71790156 | 1.0283916  | 0.00080046 | 0.00316419 |
| AC244035.1  | 2.56243781 | 1.23572417 | -1.0521602 | 0.00127615 | 0.00465539 |
| ALPP        | 21.4802681 | 9.48303357 | -1.1795915 | 3.41E-10   | 2.44E-08   |
| CYS1        | 2.68590004 | 6.42191165 | 1.25759721 | 0.00057088 | 0.00239282 |
| TFF3        | 833.832882 | 353.892452 | -1.2364473 | 4.41E-10   | 2.96E-08   |
| RPL41P5     | 25.5698087 | 54.0831117 | 1.08073679 | 1.33E-07   | 2.52E-06   |
| COL26A1     | 8.18490028 | 16.7732072 | 1.03512183 | 0.00058143 | 0.00242641 |
| AC107983.1  | 1.84514983 | 5.56878928 | 1.59362573 | 5.61E-06   | 5.24E-05   |
| RPL13AP20   | 2.59737961 | 6.10503949 | 1.23294375 | 2.51E-10   | 1.87E-08   |
| SST         | 19.1713732 | 115.61877  | 2.59235004 | 0.00247806 | 0.00795691 |
| SCGB1A1     | 28.3108392 | 12.4630888 | -1.1836929 | 0.0013497  | 0.00488499 |
| S100A1      | 9.82836273 | 21.8543901 | 1.15290011 | 1.79E-07   | 3.18E-06   |
| CALB2       | 1.14270719 | 10.0727146 | 3.13992487 | 1.63E-05   | 0.00012501 |
| POU3F3      | 1.5708231  | 3.30742662 | 1.07418843 | 2.12E-05   | 0.0001553  |
| SLC23A1     | 3.02113245 | 1.36734569 | -1.1437114 | 5.48E-10   | 3.44E-08   |
| ORM1        | 15.7579175 | 5.99590228 | -1.3940281 | 0.00847932 | 0.02154132 |
| PAGE2       | 1.14388853 | 4.27648493 | 1.90247898 | 0.00646878 | 0.01729643 |
| PPP1R14BP3  | 16.538566  | 34.030963  | 1.04101383 | 2.23E-13   | 7.48E-11   |
| UCHL1       | 20.0102719 | 45.9848857 | 1.20041898 | 4.36E-12   | 7.52E-10   |
| LRRC26      | 6.87108733 | 3.06488815 | -1.164704  | 8.83E-10   | 4.90E-08   |
| EEF1B2P6    | 0.63062936 | 1.71045986 | 1.43952001 | 3.99E-08   | 9.89E-07   |
| FSD1        | 0.68535822 | 1.71058134 | 1.31955655 | 1.70E-05   | 0.00012993 |

|            |            |            |            |            |            |
|------------|------------|------------|------------|------------|------------|
| COX4I2     | 1.34935093 | 4.93013362 | 1.86936114 | 5.02E-10   | 3.25E-08   |
| RSPO4      | 0.92421563 | 2.39716931 | 1.37503042 | 3.27E-05   | 0.00022258 |
| AP003306.2 | 1.80709346 | 0.8704608  | -1.0538199 | 6.05E-09   | 2.16E-07   |
| AC099560.2 | 0.86989736 | 1.94767277 | 1.16283421 | 2.28E-07   | 3.87E-06   |
| KLK6       | 9.41544675 | 19.4572235 | 1.0472044  | 0.02148312 | 0.04581003 |
| PGR        | 15.2907759 | 7.4147702  | -1.0441877 | 7.73E-14   | 3.34E-11   |
| TEKT4      | 3.82877832 | 1.6662221  | -1.2003034 | 1.63E-07   | 2.97E-06   |
| AC016596.1 | 4.29785078 | 13.3798542 | 1.6383751  | 1.51E-05   | 0.00011786 |
| AC004540.2 | 1.94682082 | 4.384312   | 1.17123036 | 2.33E-08   | 6.58E-07   |
| APOBEC4    | 2.01059792 | 0.87494445 | -1.2003613 | 4.26E-09   | 1.64E-07   |
| FBN3       | 1.14438956 | 2.29784792 | 1.00570507 | 0.0030218  | 0.00937603 |
| MUC5AC     | 3.16524616 | 1.45195312 | -1.1243228 | 0.00174757 | 0.00602516 |
| CRABP1     | 12.7748486 | 37.150826  | 1.54008809 | 6.50E-06   | 5.90E-05   |
| KRT13      | 5.86778803 | 2.33384102 | -1.3301105 | 0.02266185 | 0.04779898 |
| LMO1       | 0.60672615 | 1.49851809 | 1.30441909 | 1.30E-09   | 6.65E-08   |
| FOXB1      | 1.74284062 | 0.80643772 | -1.1118056 | 9.92E-07   | 1.29E-05   |
| TNNT1      | 9.16300497 | 25.1378031 | 1.45596586 | 1.44E-09   | 7.19E-08   |
| PRAP1      | 2.17046503 | 4.98653514 | 1.20003354 | 0.00055802 | 0.00234842 |
| RPL37P6    | 1.24085065 | 2.66765642 | 1.10424338 | 2.89E-07   | 4.65E-06   |
| GP2        | 5.10060091 | 0.61055312 | -3.0624785 | 1.80E-06   | 2.13E-05   |
| ECEL1P1    | 2.25067058 | 0.91948619 | -1.2914551 | 2.71E-13   | 8.64E-11   |
| ENHO       | 1.12508128 | 2.63883105 | 1.22986976 | 1.57E-07   | 2.89E-06   |
| GAS2L2     | 3.77349739 | 1.77076611 | -1.0915286 | 6.55E-09   | 2.30E-07   |
| MIR3616    | 2.06629121 | 0.90508415 | -1.1909198 | 5.51E-14   | 2.78E-11   |
| RPL35P1    | 0.79930005 | 2.01153836 | 1.33149016 | 1.29E-12   | 3.03E-10   |
| AC013724.1 | 4.27043882 | 1.88740107 | -1.1779833 | 9.20E-10   | 5.04E-08   |
| DLK1       | 0.27928504 | 2.71245256 | 3.2797877  | 0.00022375 | 0.00110841 |
| NTS        | 6.74764911 | 49.3895019 | 2.87174756 | 0.00349434 | 0.01054492 |
| CFAP161    | 3.3751271  | 1.50574971 | -1.1644598 | 3.91E-08   | 9.70E-07   |
| RPS28P7    | 144.99401  | 391.92398  | 1.43458055 | 0.00155973 | 0.00548706 |
| AL603825.1 | 1.07614877 | 2.28468108 | 1.08611526 | 3.14E-06   | 3.31E-05   |
| DNAH9      | 1.69054111 | 0.72583021 | -1.2197811 | 1.44E-10   | 1.14E-08   |
| NPW        | 2.68741215 | 6.0560753  | 1.17216555 | 0.00021712 | 0.00108264 |
| SERPINA6   | 11.2683662 | 5.05285629 | -1.1571073 | 3.25E-11   | 3.58E-09   |
| C6         | 1.46991499 | 0.68107332 | -1.1098507 | 1.73E-06   | 2.05E-05   |
| RNA5SP202  | 18.1422541 | 0.71585228 | -4.663548  | 0.01053421 | 0.02562664 |
| MUC15      | 0.61754206 | 1.43275624 | 1.21418387 | 5.13E-05   | 0.00032705 |
| ANO1       | 27.5004761 | 13.1893268 | -1.0600857 | 1.07E-13   | 4.05E-11   |
| EEF1A2     | 13.6038971 | 27.791431  | 1.03062012 | 0.0143229  | 0.03300965 |
| NEFH       | 1.9037535  | 3.83613405 | 1.01080645 | 0.0024132  | 0.00779699 |
| NPY        | 0.71220083 | 1.64883226 | 1.21108862 | 0.00041376 | 0.00181692 |
| RBP4       | 3.52256571 | 8.50036037 | 1.27089739 | 0.01893758 | 0.04138248 |
| MAGEA11    | 0.52903154 | 1.46370502 | 1.4681992  | 7.02E-05   | 0.00042387 |

|            |            |            |            |            |            |
|------------|------------|------------|------------|------------|------------|
| LINC00261  | 8.46801436 | 4.121479   | -1.0388616 | 3.87E-08   | 9.66E-07   |
| LEMD1      | 2.20558787 | 4.56797231 | 1.05039067 | 0.01480023 | 0.03389606 |
| SRARP      | 3.14929897 | 1.42781171 | -1.141225  | 2.37E-11   | 2.81E-09   |
| DLL3       | 0.37607567 | 1.78636436 | 2.24793149 | 9.23E-07   | 1.21E-05   |
| IGSF1      | 0.21461052 | 1.97510267 | 3.20213493 | 1.99E-07   | 3.47E-06   |
| BPIFB2     | 7.00783038 | 2.07572919 | -1.7553496 | 0.00070043 | 0.00283456 |
| CALCB      | 1.28123361 | 3.62086137 | 1.4987994  | 1.85E-05   | 0.00013848 |
| AL162411.1 | 0.71798917 | 1.68393965 | 1.22980645 | 4.00E-07   | 6.09E-06   |
| ADAMTS6    | 1.87687311 | 0.86915204 | -1.1106506 | 2.55E-08   | 7.07E-07   |
| CDHR4      | 9.46022562 | 4.18098675 | -1.1780311 | 1.81E-09   | 8.41E-08   |
| AC018738.1 | 7.90687149 | 28.976023  | 1.87368071 | 2.33E-09   | 1.04E-07   |
| DOK5       | 0.8520314  | 1.94847371 | 1.19336596 | 2.21E-05   | 0.00016079 |
| MT1H       | 3.69304049 | 9.24467747 | 1.32381391 | 0.00025578 | 0.00123213 |
| WDR38      | 16.6305168 | 7.89427742 | -1.0749539 | 1.64E-08   | 5.00E-07   |
| AZGP1      | 1.55988703 | 4.33865622 | 1.47580673 | 0.0194706  | 0.04232413 |
| MAGEA4     | 1.10542499 | 3.3642493  | 1.60568349 | 0.00397343 | 0.01167618 |
| RPL21P28   | 1.38646248 | 3.24133283 | 1.2251786  | 3.82E-08   | 9.59E-07   |
| GREM2      | 5.5532608  | 2.6025497  | -1.0934094 | 0.00015402 | 0.00081331 |
| RPL39      | 23.7485898 | 50.1375881 | 1.07805075 | 9.04E-11   | 8.15E-09   |
| HOXA4      | 0.72653295 | 1.74643537 | 1.26531311 | 3.19E-08   | 8.44E-07   |
| C22orf15   | 2.3313738  | 1.15168095 | -1.0174392 | 8.09E-08   | 1.77E-06   |
| AC113935.1 | 7.22660674 | 15.4180858 | 1.09323337 | 5.76E-08   | 1.35E-06   |
| PLPPR3     | 3.37045157 | 1.40392438 | -1.2634767 | 3.02E-06   | 3.21E-05   |
| MUC6       | 15.255163  | 6.90280304 | -1.1440434 | 2.80E-06   | 3.03E-05   |
| CCKBR      | 0.78567513 | 1.58909508 | 1.01620066 | 0.00016382 | 0.00085706 |
| CNGA4      | 2.92651884 | 1.14410901 | -1.3549611 | 2.74E-14   | 2.00E-11   |
| CALCA      | 5.5680687  | 11.599234  | 1.05878062 | 0.00647865 | 0.01730795 |
| TUBA3E     | 1.84250556 | 0.51953246 | -1.8263832 | 5.93E-06   | 5.49E-05   |
| AL133415.1 | 1.82616131 | 0.84914036 | -1.1047393 | 9.93E-12   | 1.37E-09   |
| RN7SL250P  | 1.54685263 | 0.7457239  | -1.0526223 | 3.48E-13   | 1.03E-10   |
| ERICH3     | 2.03833016 | 0.93372015 | -1.1263256 | 4.89E-10   | 3.22E-08   |
| GAL        | 1.59581855 | 3.54348099 | 1.15087069 | 7.05E-07   | 9.67E-06   |
| SP6        | 1.6138426  | 3.24982506 | 1.00986218 | 0.00228441 | 0.00747013 |
| HMG2N2P17  | 0.69965737 | 1.69460256 | 1.27622645 | 2.90E-08   | 7.85E-07   |
| HMG2B1P10  | 1.13725805 | 2.43068588 | 1.09580382 | 2.26E-08   | 6.41E-07   |
| ALPG       | 66.6750304 | 32.5351577 | -1.035147  | 3.25E-07   | 5.15E-06   |
| SIX3       | 1.07725732 | 2.18992412 | 1.02351797 | 0.01127554 | 0.0271014  |
| PRSS50     | 1.13737186 | 3.17188267 | 1.47963538 | 0.00027547 | 0.00130655 |
| CHST4      | 1.5196834  | 0.63190646 | -1.2659879 | 2.63E-09   | 1.12E-07   |
| RNY3P16    | 0.69262372 | 1.47630924 | 1.09185126 | 1.04E-05   | 8.65E-05   |
| TUBA3D     | 4.20358932 | 1.59058718 | -1.4020623 | 8.35E-07   | 1.11E-05   |
| AC079922.1 | 1.32355997 | 4.48364242 | 1.76024767 | 2.42E-13   | 7.90E-11   |
| TUBA4B     | 11.6937176 | 5.30307388 | -1.1408329 | 1.51E-09   | 7.47E-08   |

|            |            |            |            |            |            |
|------------|------------|------------|------------|------------|------------|
| AC099336.2 | 2.61670826 | 8.32612407 | 1.66989197 | 6.07E-10   | 3.72E-08   |
| FAM189A2   | 6.74020738 | 3.2400499  | -1.0567769 | 4.27E-11   | 4.41E-09   |
| RPL7P9     | 8.7930049  | 18.9774218 | 1.10985583 | 8.08E-11   | 7.44E-09   |
| TNNI3      | 3.09778565 | 6.86730928 | 1.14850762 | 4.84E-05   | 0.0003122  |
| HMGA2      | 1.41432557 | 2.85047738 | 1.0110893  | 8.90E-05   | 0.0005148  |
| C19orf33   | 37.8522632 | 90.0825732 | 1.25086848 | 2.10E-06   | 2.40E-05   |
| PNOC       | 1.92766345 | 5.74784045 | 1.57616682 | 3.96E-06   | 3.98E-05   |
| GNG4       | 1.19940469 | 3.48566545 | 1.53911559 | 3.68E-05   | 0.00024638 |
| VGF        | 1.05845834 | 3.74245607 | 1.8220209  | 5.78E-07   | 8.27E-06   |
| PF4V1      | 1.52389481 | 0.70971646 | -1.1024486 | 0.00912899 | 0.02286567 |
| AC011479.1 | 0.98940567 | 2.0128469  | 1.02460337 | 0.0003754  | 0.00167755 |
| TUBB2B     | 4.89652481 | 12.9011513 | 1.39766972 | 0.00239347 | 0.00774732 |
| AC099789.1 | 5.43535877 | 1.67868477 | -1.6950439 | 0.0002521  | 0.00122226 |
| GRB7       | 14.139767  | 29.8843174 | 1.07963024 | 0.00078939 | 0.00313239 |
| RPL41P1    | 41.8907649 | 131.111711 | 1.64609242 | 1.04E-09   | 5.58E-08   |
| COMP       | 4.92976756 | 16.8412135 | 1.77240457 | 3.59E-05   | 0.00024159 |
| FAM216B    | 6.38100309 | 2.5946302  | -1.2982543 | 2.43E-09   | 1.07E-07   |
| RHCG       | 1.54037083 | 3.48325766 | 1.17715948 | 0.02223477 | 0.04710945 |
| TMSB15A    | 4.17177632 | 9.63073132 | 1.20698355 | 0.00012488 | 0.00068205 |
| CCDC60     | 1.62224239 | 0.77244509 | -1.0704851 | 1.88E-07   | 3.30E-06   |
| IHH        | 42.2520964 | 20.2676886 | -1.0598414 | 8.65E-12   | 1.24E-09   |
| LGALS7B    | 1.85459854 | 5.33871257 | 1.52538495 | 4.43E-06   | 4.35E-05   |
| BASP1P1    | 3.03269731 | 1.33754234 | -1.181017  | 6.40E-10   | 3.87E-08   |
| RNA5SP149  | 4.50155377 | 1.98248125 | -1.1831158 | 0.00506877 | 0.01420671 |
| AC034236.1 | 8.43740106 | 17.8631172 | 1.08211327 | 1.08E-11   | 1.44E-09   |
| TCTE1      | 1.73445241 | 0.67017459 | -1.3718714 | 2.45E-10   | 1.84E-08   |
| SAXO2      | 1.86437269 | 0.91989439 | -1.0191501 | 8.49E-10   | 4.76E-08   |
| PANTR1     | 1.44164335 | 4.82223342 | 1.74198719 | 1.19E-05   | 9.64E-05   |
| LINC01116  | 1.50887281 | 3.52351137 | 1.22354267 | 3.95E-05   | 0.00026199 |
| PAGE2B     | 0.30416705 | 1.82672791 | 2.58632599 | 0.00092132 | 0.00355494 |
| PCSK1N     | 13.6326421 | 28.1710794 | 1.04714965 | 0.00017533 | 0.00090887 |
| CPLX2      | 1.02777225 | 2.23287034 | 1.11937887 | 0.00725605 | 0.01902112 |
| SLC25A35   | 20.7658261 | 9.02417008 | -1.2023451 | 9.69E-11   | 8.61E-09   |

---

**Table S2** The enriched GO terms of differentially expressed genes.

| ID         | Category | GO Name                                     | P.value    | Count | geneID                                                          |
|------------|----------|---------------------------------------------|------------|-------|-----------------------------------------------------------------|
| GO:0007218 | BP       | neuropeptide signaling pathway              | 2.07E-06   | 7     | NTS/NPW/NPY/CALCA/GAL/PNOC/PCSK1N                               |
| GO:0044306 | CC       | neuron projection terminus                  | 1.41E-05   | 7     | GRIK5/CALB2/UCHL1/NTS/CALCA/PNOC/CPLX2                          |
| GO:0043679 | CC       | axon terminus                               | 6.26E-05   | 6     | GRIK5/CALB2/NTS/CALCA/PNOC/CPLX2                                |
| GO:0043195 | CC       | terminal bouton                             | 0.00025053 | 4     | GRIK5/CALB2/CALCA/CPLX2                                         |
| GO:0005184 | MF       | neuropeptide hormone activity               | 1.51E-08   | 6     | NTS/NPY/CALCB/GAL/PNOC/VGF                                      |
| GO:0005179 | MF       | hormone activity                            | 3.02E-08   | 9     | SST/ENHO/NTS/NPY/CALCB/CALCA/GAL/PNOC/VGF                       |
| GO:0001664 | MF       | G protein-coupled receptor binding          | 1.09E-07   | 12    | RSPO3/CXCL5/UCHL1/NTS/NPW/NPY/CALCB/CC/KBR/CALCA/GAL/PNOC/PF4V1 |
| GO:0048018 | MF       | receptor ligand activity                    | 2.00E-05   | 12    | CXCL5/SST/ENHO/NTS/NPY/CALCB/GREM2/CALCA/GAL/PNOC/VGF/PF4V1     |
| GO:0030546 | MF       | signaling receptor activator activity       | 2.34E-05   | 12    | CXCL5/SST/ENHO/NTS/NPY/CALCB/GREM2/CALCA/GAL/PNOC/VGF/PF4V1     |
| GO:0071855 | MF       | neuropeptide receptor binding               | 5.55E-05   | 4     | NTS/NPY/CCKBR/GAL                                               |
| GO:0005200 | MF       | structural constituent of cytoskeleton      | 0.00029792 | 5     | NEFH/TUBA3E/TUBA3D/TUBA4B/TUBB2B                                |
| GO:0005201 | MF       | extracellular matrix structural constituent | 0.00043942 | 6     | COL9A3/FBN3/MUC5AC/GP2/MUC6/COMP                                |
| GO:0048306 | MF       | calcium-dependent protein binding           | 0.00157062 | 4     | DMBT1/S100A1/TNNI3/CPLX2                                        |
