# Supplementary material for: Identification and Validation of an m7G-Related lncRNAs Signature for Prognostic Prediction and Immune Function Analysis in Endometrial Cancer
Source: MDPI journal article supplement (doi:10.3390/genes13081301), 2022-07-22
Supplement: s1 [file s1]

## **SUPPLEMENTARY INFORMATION**

### **Identification and Validation of an m7G-Related lncRNAs Signature for Prognostic Prediction and Immune Function Analysis in Endometrial Cancer**

Jiani Sun †, Li Li †, Hong Chen, Lei Gan, Xiaoqing Guo and Jing Sun \*

Department of Gynecology, Shanghai First Maternity and Infant Hospital, School of Medicine, Tongji University, Shanghai 200092, China; sunjiani5947@163.com (J.S.); 1931199@tongji.edu.cn (L.L.); chenhong377@163.com (H.C.); gan\_leilei@126.com (L.G.); xiaoqing\_guo@tongji.edu.cn (X.G.)

\* Correspondence: sunjing61867@tongji.edu.cn

† These authors contributed equally to this work.

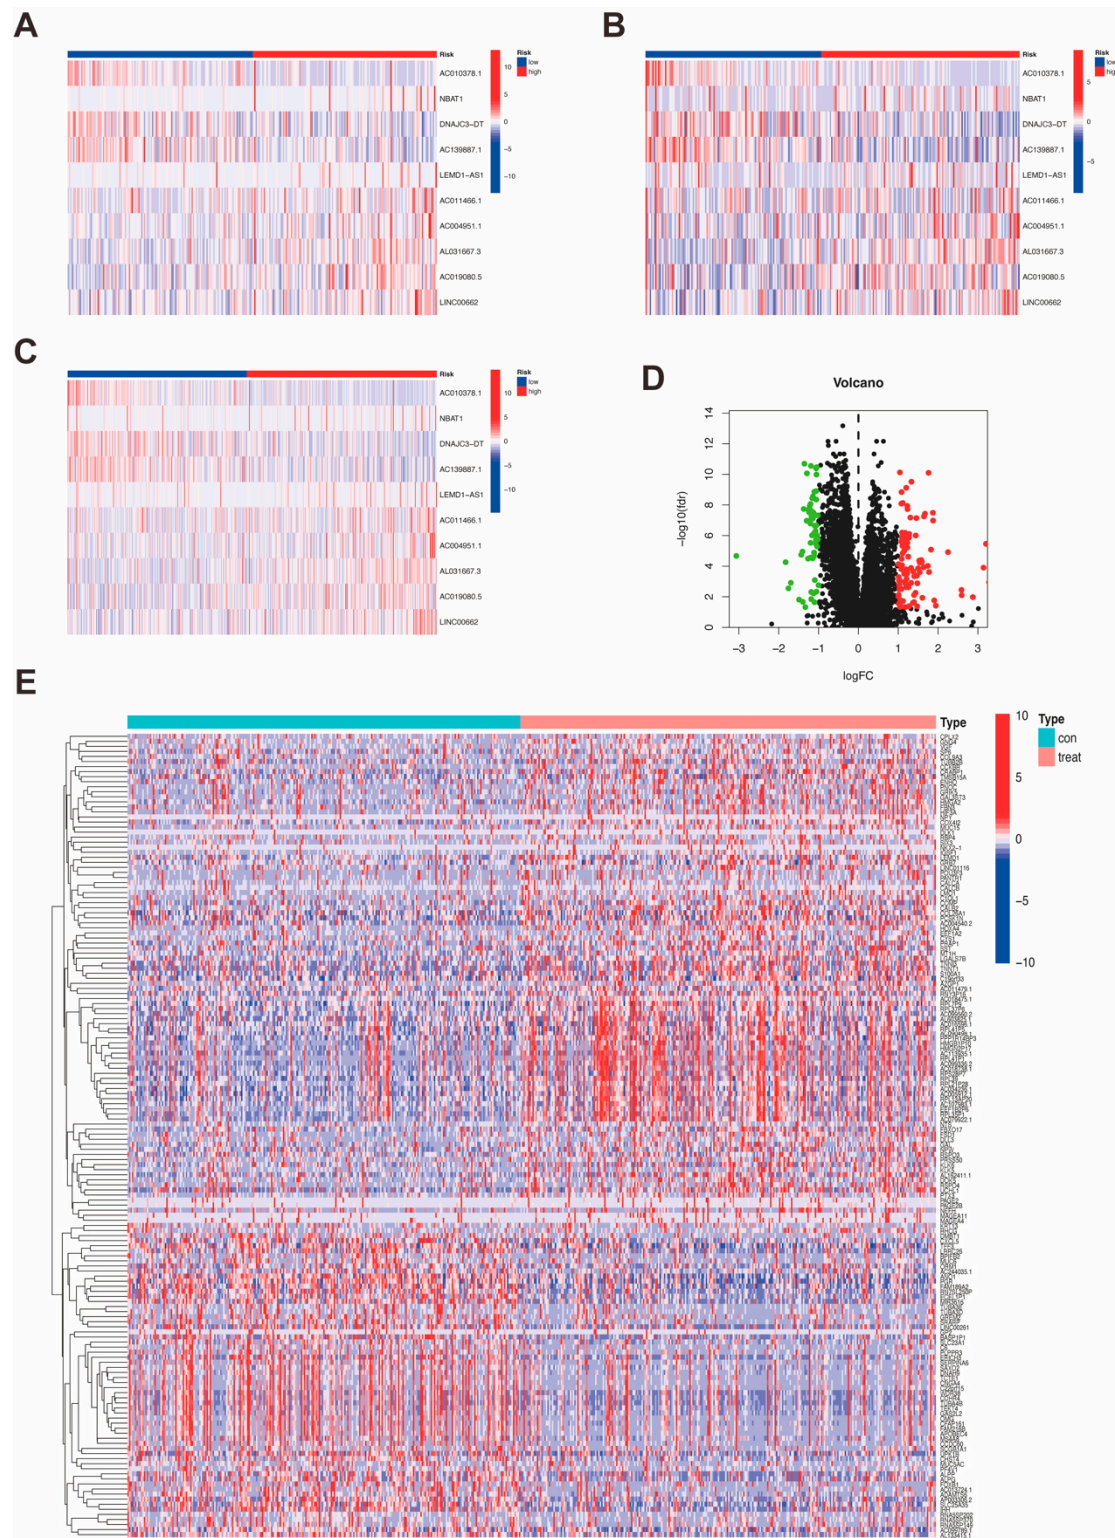

**Figure S1. The expression heatmap of MRLs and DEGs.** (A-C) The expression heatmap of 6 MRLs in the training group, validation group and overall group. (D) The expression volcano plot of DEGs. (E) The expression heatmap of DEGs

**A**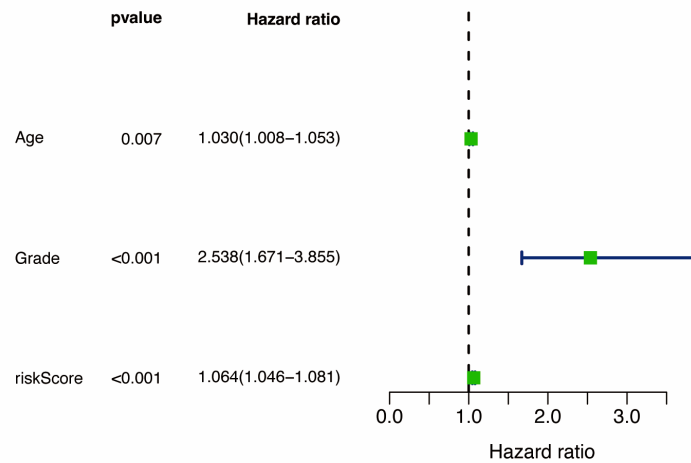**B**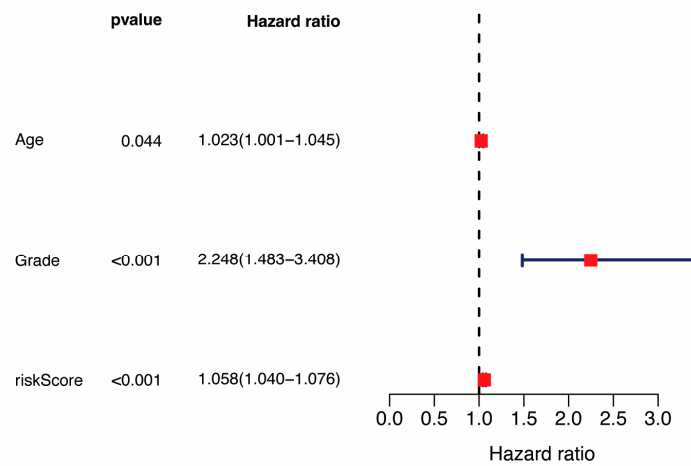**C**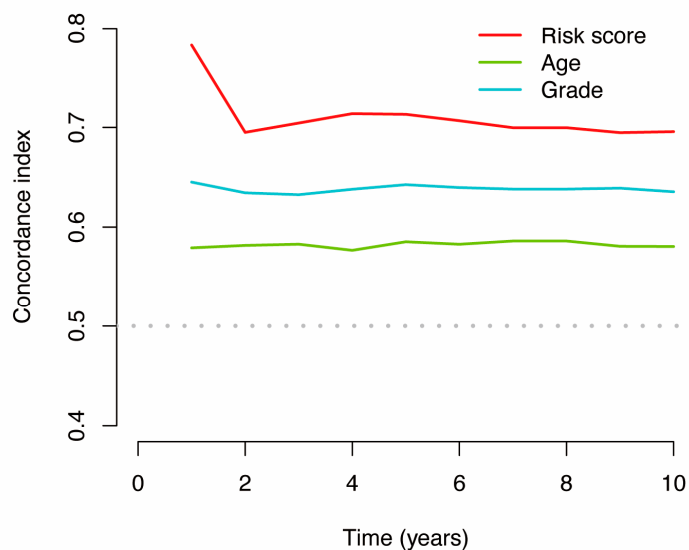

**Figure S2. Independent prognostic factors for UCEC patients.** (A) Independent prognostic factors identified by univariate Cox regression. (B) Independent prognostic factors identified by multivariate Cox regression. (C) The concordance index of the model.
